# 1 Individual differences in response precision correlate with adaptation bias

2 Marcelo G. Mattar<sup>\*†1</sup>, Marie V. Carter<sup>2</sup>, Marc S. Zebrowitz<sup>2</sup>, Sharon L. Thompson-Schill<sup>1</sup> and  
3 Geoffrey K. Aguirre<sup>2</sup>

4 <sup>1</sup>Department of Psychology, University of Pennsylvania, Philadelphia, PA 19104, USA

5 <sup>2</sup>Department of Neurology, University of Pennsylvania, Philadelphia, PA 19104, USA

6 The internal representation of stimuli is imperfect and subject to bias. Noise introduced at initial  
7 encoding and during maintenance degrades the precision of representation. Stimulus estimation is also biased  
8 away from recently encountered stimuli, a phenomenon known as adaptation. Within a Bayesian framework,  
9 greater biases are predicted to result from poor precision. We tested for this effect in individual difference  
10 measures. 202 subjects contributed data through an on-line experiment (<https://cfn.upenn.edu/iadapt>).  
11 During separate face and color blocks, subjects performed three different tasks: an immediate stimulus-  
12 match (15 trials), a 5 seconds delayed match (30 trials), and 5 seconds of adaptation followed by a delayed  
13 match (30 trials). The stimulus spaces were circular and subjects entered their responses using a color/face  
14 wheel. Bias and precision of responses were extracted by fitting a mixture of von Mises distributions  
15 to account for random guesses. Two blocks of each measure were obtained, allowing for tests of measure  
16 reliability. We found that reliable differences between individuals in precision were as great as those between  
17 tasks or materials. The adaptation manipulation induced the expected bias in responses (colors: 7.8°; faces:  
18 5.0°), and the magnitude of this bias reliably and substantially varied between subjects. Across subjects,  
19 there was a negative correlation between mean precision and bias (color:  $\rho = -0.26$ ; faces:  $\rho = -0.13$ ). This  
20 relationship was replicated in a new experiment with 192 subjects (color:  $\rho = -0.22$ ; faces:  $\rho = -0.19$ ).  
21 This result is consistent with a Bayesian observer model, in which individual differences in the precision of  
22 perceptual representation influences the magnitude of adaptation bias.

---

\*Present address: Princeton Neuroscience Institute, Princeton University, Princeton, NJ 08540, USA

†Corresponding author: [mmattar@princeton.edu](mailto:mmattar@princeton.edu)

## 23 Introduction

24 Under conditions of uncertainty, we rely upon prior beliefs about the world to interpret sensory stimuli,  
25 giving rise to biases. Perception can be understood as a “best guess” as to what is in the world, and  
26 when sensory information is imperfect our best guess relies more heavily on expectations and prior beliefs  
27 (von Helmholtz, 1867; Knill and Richards, 1996). Prior knowledge influences perception continuously and  
28 automatically, occasionally even leading to perceptual illusions (Bar, 2004; Summerfield and Egner, 2009;  
29 Lafer-Sousa et al., 2015). To achieve statistically optimal inference, sensory evidence and prior beliefs can  
30 be quantitatively combined using Bayes’ rule (Bayes and Price, 1763). Under many circumstances, human  
31 perception is consistent with Bayesian observer models (Knill and Richards, 1996; Stocker and Simoncelli,  
32 2006b).

33 A ubiquitous example of a perceptual bias produced by sensory history is visual adaptation, where  
34 estimates are shifted “away” from recently observed stimuli (Levinson and Sekuler, 1976; Clifford, 2002).  
35 Visual adaptation has been observed for a variety of stimuli such as line orientation, motion, color, and even  
36 complex stimuli such as face identity or gender (Gibson and Radner, 1937; Anstis et al., 1998; Jameson and  
37 Hurvich, 1972; Webster et al., 2004; Little et al., 2005). In all cases, stimuli appear to be more different  
38 from the adapting stimulus than they actually are, causing illusory perceptual distortions (Eagleman, 2001).  
39 While particularly evident in the few seconds following an extended presentation of a stimulus, perception  
40 and neural responses are affected by sensory history over a variety of timescales and this process is likely  
41 constantly at work in the nervous system (Fischer and Whitney, 2014; Mattar et al., 2016).

42 An intuitive explanation for visual adaptation within a Bayesian framework is that it affects the prior  
43 distribution; i.e., sensory “expectations” are altered after prolonged exposure to a stimulus type. If this  
44 is the case, then a greater bias towards this altered prior should be expected when incoming sensory  
45 representations are uncertain. For example, adding either internal or external noise to a stimulus to be  
46 remembered produces increasingly larger biases towards a stored color prior (Olkkonen et al., 2014). Here,  
47 we ask if the fidelity of storing and reproducing sensory percepts (i.e., precision) also influences adaptation  
48 biases. Using a web-based visual adaptation experiment with color and face stimuli, we investigated the  
49 relationship between variability in response precision and adaptation biases across individuals. We found  
50 that the precision and bias are relatively stable measures of an individual, and that biases for color stimuli  
51 are correlated with biases for face stimuli. We then investigated the relationship between bias and precision  
52 across individuals and found that biases for both materials are larger when precision is lower. These results  
53 conform with predictions of Bayesian observer models whereby perception is biased increasingly away from  
54 recently observed stimuli when sensory information is uncertain.

## 55 Results

56 We investigated the relationship between variation in precision and adaptation bias across individuals. A  
57 total of 530 people recruited through Amazon Mechanical Turk performed an on-line experiment on a  
58 website (<https://cfn.upenn.edu/iadapt>) custom-built for this study. Each subject performed a series of  
59 psychophysics experiments on their personal computers and received compensation for their time (Fig. 1a).  
60 On each experimental trial, subjects were instructed to report the value of a target stimulus — a color or  
61 a face — by clicking and dragging the mouse pointer around a stimulus wheel, allowing a fine adjustment  
62 of their responses (Fig. 1b). Wheels were comprised of 360 distinct stimuli varying in hue (colors) or in age  
63 and gender (faces; Fig. 1d).

64 Following a screen contrast adjustment and a web-based version of the Ishihara test for normal color  
65 vision (Ishihara, 1960), subjects completed two replications of three experiments for each stimulus class.  
66 Each experiment was preceded by a set of written instructions, a mini-quiz containing three questions about  
67 the instructions, and a short practice block. Subjects were required to respond correctly to all questions in  
68 the quiz and to achieve near-perfect accuracy in the practice blocks (within  $5^\circ$  of the target value in every  
69 trial) to proceed to the main experimental trials (Fig. 1a). In the *stimulus-match* experiment (15 trials),  
70 designed to obtain a baseline response precision for each subject, subjects were instructed to select a value  
71 on the wheel matching the target stimulus, indicated as two colors/faces continuously presented on the left  
72 and right sides of the screen, outside of the stimulus wheel (Fig. 1c, top). In the *delayed-match* experiment  
73 (30 trials), designed to estimate subject's working memory precision, a target stimulus was presented on  
74 the center of the screen for 2.0 s, followed by a 4.0 s delay, after which subjects were to select a value on the  
75 wheel matching the target stimulus (Fig. 1c, middle). In the *adaptation* experiment (30 trials), designed to  
76 estimate the magnitude of adaptation biases, an adapting stimulus was presented in the center of the screen  
77 for 5 seconds followed by brief mask and a target stimulus  $\pm 45^\circ$  away from the adaptor for 100ms, after  
78 which subjects were to select a value on the wheel matching the target stimulus (Fig. 1c, bottom). Subjects  
79 performed two separate blocks of each experiment in a session, allowing for tests of measure reliability, and  
80 the trials within each experiment were sampled uniformly and in random order from the circular space  
81 (Fig. 1d). Throughout the entire session, subjects were only allowed to proceed to the next block of the  
82 experiment if their accuracy remained above a minimum threshold (see Methods). A total of 328 subjects  
83 were either excluded or abandoned the experiment (108 at the color vision test and 202 during the main  
84 experimental trials), leaving 202 subjects for the main analyses described in this chapter (Table 1).

85 We calculated the error on each trial as the difference between the target value and the response entered  
86 ( $\varepsilon = \theta_{target} - \theta_{response}$ ), and we fit the distribution of error values for each subject using a superposition

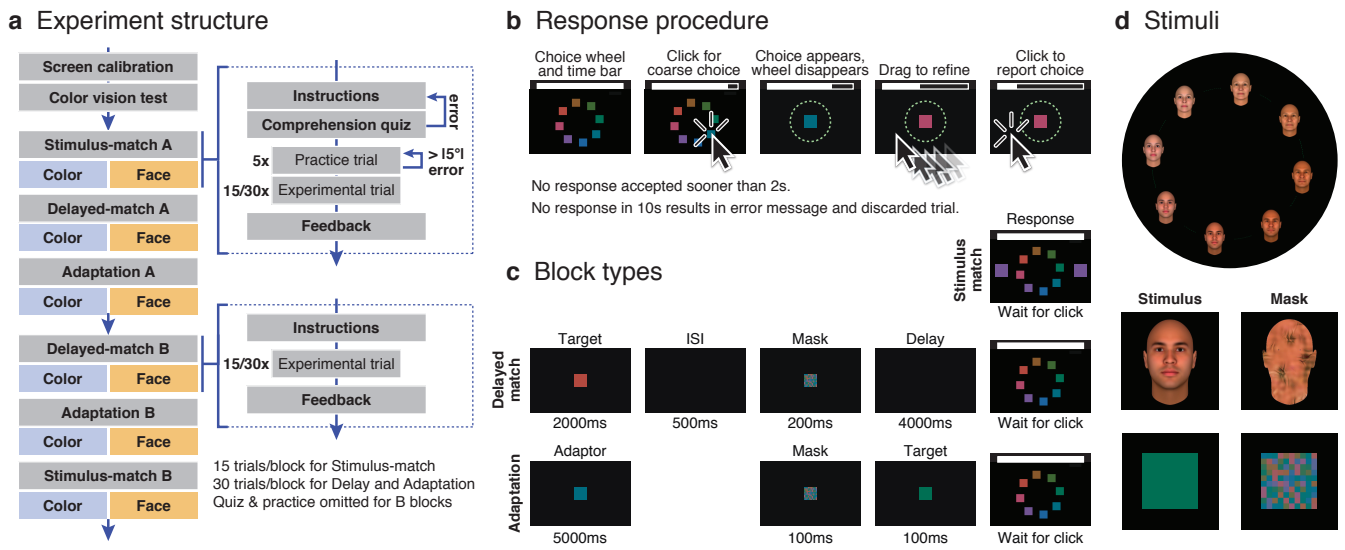

**Figure 1: Experiment setup and methods.** (a) Experiment structure. Subjects completed a battery of tests designed to estimate representation precision, precision after a delay, and precision and bias after adaptation. Each subject completed two blocks of each experiment, for both color and face stimuli. Prior to each experiment, subjects were presented with instructions and a comprehension quiz; the first time they performed each block of a given experiment, they also completed 5 practice trials. Each block of the stimulus-match experiment had 15 trials. Each block of the delayed-match and adaptation experiments had 30 trials. (b) Response procedure. Subjects were first presented with 8 equally spaced representative stimuli around the wheel. To enter their responses, subjects first performed a coarse selection by clicking on the region of the wheel that approximately matched the target. They then adjusted their selection more precisely by dragging the pointer around the wheel and clicking a second time to confirm their responses. (c) Block types. Top: On each trial of the stimulus-match experiment, subjects were instructed to match to a stimulus presented on both sides of the screen; the target stimulus remained on the response screen while the subject made the match. Middle: On each trial of the delayed-match experiment, subjects were instructed to match to a target stimulus following a 4 second interval. Bottom: On each trial of the adaptation experiment, subjects were instructed to match to a target stimulus that was presented after a 5 second adaptation period. (d) Stimuli. A circular space with 360 stimuli was used for both color and face stimuli. Color stimuli were generated to vary in hue but not in saturation or luminance (HSL space). Face stimuli varied in age and gender, each forming one axis of the space. Color masks were a checkerboard composed of various stimuli randomly sampled from the color space. The eight stimuli that are shown in the figure and in the response screen are equally spaced examples from the entire set of 360, and were selected at random on each trial. Face masks were created using the steerable pyramids method to match various low-level visual properties (Portilla and Simoncelli, 2000).

**Table 1: Subject enrollment and exclusion in the main experiment.** The total in the cells may not match the total number of subjects due to missing responses from some subjects.

| Completed:         | Registration | Screening   | Experiment  |
|--------------------|--------------|-------------|-------------|
| Number of subjects | 530          | 422         | 202         |
| Age: $M \pm SD$    | $36 \pm 12$  | $36 \pm 11$ | $35 \pm 11$ |
| Male/Female        | 252/277      | 191/231     | 92/110      |
| Left/Right-handed  | 18/508       | 14/405      | 3/197       |

87 of distributions defined over a circular support ( $-180^\circ < \theta < +180^\circ$ ) (Zhang and Luck, 2008; Bays et al.,  
 88 2009). This procedure simultaneously estimates the precision of the error distribution (i.e., the inverse of the  
 89 standard deviation of the corresponding wrapped normal distribution; Jammalamadaka and Sengupta, 2001)  
 90 and the probability of random guesses (Fig. 2a). In the adaptation experiment, we used the distribution of  
 91 reflected error values ( $-\varepsilon$ ) from trials where the adaptor was at  $+45^\circ$  from the target ( $\theta_{adaptor} - \theta_{target} =$   
 92  $45^\circ$ ), resulting in a distribution of error values where adaptors are effectively all located at  $-45^\circ$ . In  
 93 these experiments, the fitting procedure also estimates two additional parameters: the mean of the error  
 94 distribution (i.e., the bias induced by the paradigm) and the probability that the selected response matches  
 95 the adaptor stimulus and not the target stimulus (Fig. 2b,c).

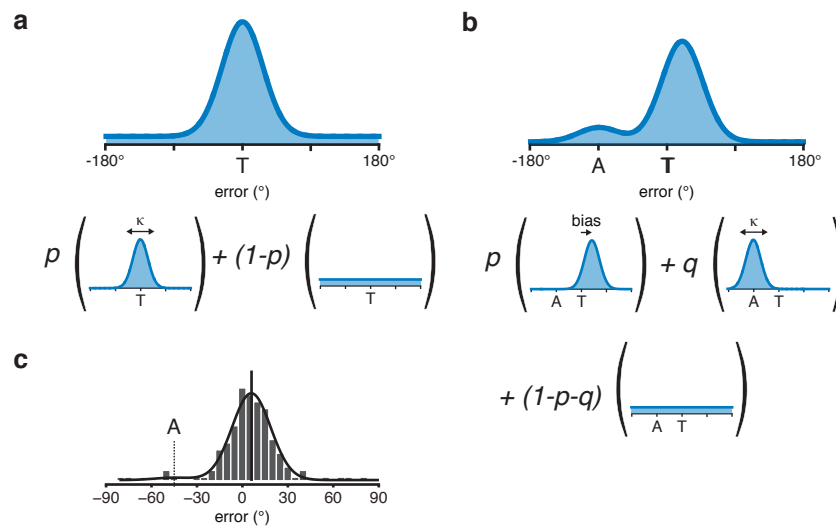

**Figure 2: Mixture model fitting approach.** The distribution of errors were modeled as a superposition of probability distributions to account for different types of responses. (a) In the stimulus-match and delayed-match experiments, responses could be concentrated near the target value (von Mises distribution centered at the target value) or fall randomly in any position of the space with equal probability (von Mises distribution with concentration parameter equal to zero). Two parameters were estimated: the concentration parameter of the responses near the target, and the probability of random responses. (b) In the adaptation experiment, responses could be concentrated near the target value (von Mises distribution displaced from the target by a fixed amount), concentrated near the adaptor value (a stimulus that the subjects were instructed to ignore, modeled as a von Mises distribution centered at the adaptor value) or fall randomly in any position of the space with equal probability (von Mises distribution with concentration parameter equal to zero). Four parameters were estimated: the magnitude of the displacement of responses near the target (bias), the concentration parameter of the responses near the target, the probability of responses near the adaptor, and the probability of random responses. (c) Example of a good fit for a subject in the adaptation experiment. Data are collapsed across both blocks of the adaptation experiment, and indicates the existence of a positive (repulsive) bias in relation to the adaptor.

Table 2: Parameters from group fit of the adaptation data in the main experiment.

|        | Bias | Concentration | P(target) | P(adaptor) | P(random) |
|--------|------|---------------|-----------|------------|-----------|
| Colors | 7.8° | 10.3          | 95.1%     | 2.3%       | 2.6%      |
| Faces  | 5.0° | 7.0           | 90.1%     | 5.2%       | 4.1%      |

96 **Adaptation produces a repulsive bias**

97 To confirm the effectiveness of our adaptation paradigm in inducing repulsive biases, we first fit the adap-  
98 tation data from all subjects combined (12,120 trials per stimulus class) with a mixture of distributions  
99 as described. We observed a positive (repulsive) bias of 7.8° and 5.0° for color and face stimuli, respec-  
100 tively. We also estimate that subjects responded randomly in 2.6% and 4.1% of the trials, and that their  
101 responses matched the adaptor stimulus in 2.3% and 5.2% of the trials, with the remaining 95.1% and  
102 90.8% concentrating around the target value (Fig. 3). These results confirm that the paradigm induced the  
103 typical *repulsive* after-effects, in which subject responses to target stimuli tend to be biased *away* from the  
104 preceding, adapting stimulus (Table 2).

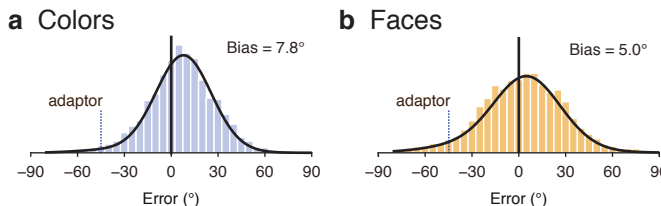

Figure 3: **Estimation of adaptation biases at the population level.** (a) Group adaptation results for all color trials. The bars provide the histogram of error (5° bins) in responses across all trials and all subjects in the adaptation experiment that used color stimuli. If subjects reported the color of the target stimulus perfectly, all trials would have zero error. Each trial in the adaptation experiment featured a five second adaptor stimulus, which in this plot has a relative location of  $-45^\circ$  and is indicated with the blue dotted line. The black line shows the fit to the data provided by the model shown in Fig. 2b. As can be seen, the peak of the distribution of error responses is shifted to the right of zero, indicating that subjects had a bias ( $M = 7.8^\circ$ ) in reporting the value of the target stimulus. (b) Similar results for all face trials. As can be seen, the peak of the distribution of error responses is again shifted to the right of zero, indicating that subjects had a bias ( $M = 5.0^\circ$ ) in reporting the value of the target stimulus.

105 **Individual differences in adaptation bias and representation precision are negatively**  
106 **correlated**

107 We then fit the response bias data for each individual subject. We found that adaptation bias did not  
108 significantly differ between blocks (one-way ANOVA:  $F(1, 806) = 0.0073$ ,  $p = 0.93$ ), suggesting that the  
109 magnitude of adaptation biases is a stable individual characteristic for the duration of the experiment. For  
110 that reason, we collapsed subject data across both blocks of each experiment. We then performed a two-way

111 analysis of variance to identify the sources of variability in adaptation bias. We observed a significant effect  
112 of stimulus class ( $F(1, 404) = 87.9, p \approx 0$ ), but this effect explained only 5% of the total variance. We also  
113 observed a significant effect of mean subject bias ( $F(201, 404) = 3.72, p \approx 0$ ) accounting for 45% of the  
114 total variance, an effect greater than the 26% variance attributable to the difference between stimulus type  
115 across subjects (subject  $\times$  stimulus,  $F(201, 404) = 2.14, p \approx 0$ ). Accordingly, we observe that there is a  
116 correlation across subjects in their average face and color bias scores (Pearson's  $r = 0.22$ ). The distribution  
117 of individual subject bias was well fit with a Gaussian with a mean of  $8.0^\circ$  for colors (95% CI [ $0.2^\circ, 18.8^\circ$ ])  
118 and  $5.3^\circ$  for faces (95% CI [ $-4.9^\circ, 17.1^\circ$ ]). These results are consistent with an individual difference in  
119 adaptation bias that is present across face and color stimuli.

120 We next extracted the width (i.e., precision) of the error distribution for each subject, separately for  
121 each block of each experiment. Again, because precision did not significantly differ between blocks (one-way  
122 ANOVA:  $F(1, 2420) = 0.4, p = 0.49$ ), we collapsed subject data across both blocks of each experiment. We  
123 then performed a three-way analysis of variance to identify the sources of variability in response preci-  
124 sion. We observed a significant effect of individual variability ( $F(201, 1006) = 2.84, p \approx 0$ ), of task type  
125 ( $F(2, 1006) = 300.0, p \approx 0$ ), and of stimulus class ( $F(1, 1006) = 586.6, p \approx 0$ ). Furthermore, we found  
126 that subject, task and stimulus all explained about the same variance (21%, 22%, and 21%, respectively).  
127 Response precision estimated from *stimulus-match* trials was well correlated with precision estimated from  
128 the *adaptation* experiment (color:  $r = 0.44$ ; faces:  $r = 0.45$ ; Fig. 4a,b).

129 We then asked if subjects with a lower representation precision are more or less prone to adaptation  
130 biases. We investigated the statistical relationship between average representation precision and adaptation  
131 bias, both estimated from the *adaptation* experiment. We observed that, across subjects, there was a  
132 negative correlation between mean precision and bias (Spearman's rank correlation, color:  $\rho = -0.26$ , 95%  
133 CI [ $-0.28, -0.25$ ]; faces:  $\rho = -0.13$ , 95% CI [ $-0.15, -0.12$ ]; Fig. 4c,d). This suggests that subjects with  
134 lower representation precision are subject to larger biases away from the adapting stimulus, in line with  
135 predictions from a Bayesian observer model.

## 136 **Replication experiment**

137 We wished to replicate the observed relationship between representation precision and adaptation bias with  
138 more trials per subject. An additional group of 472 people were recruited through Amazon Mechanical  
139 Turk. From this set, 89 were excluded or abandoned at the color vision test, and 191 during the main  
140 experimental trials, leaving 192 subjects for the replication analyses (Tables 3, 4). Subjects performed a  
141 slightly modified version of our experiment: two blocks of the *stimulus-match* experiment (30 trials), two

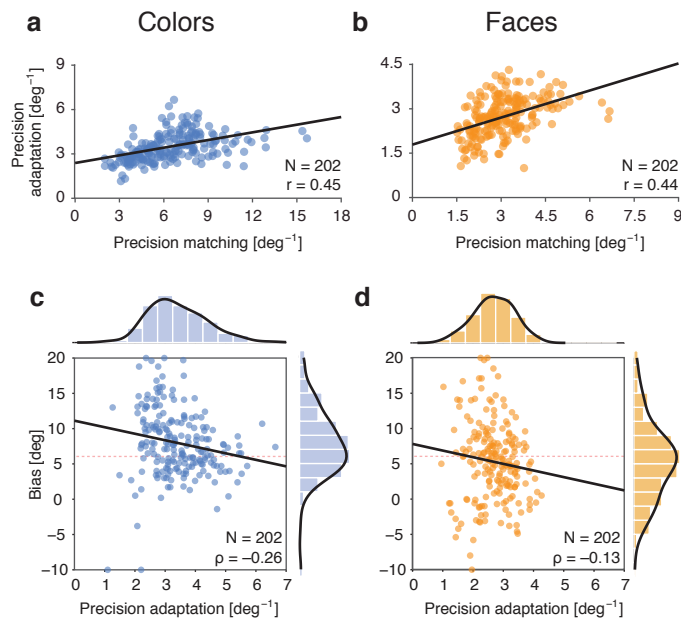

Figure 4: **Individual differences in representation precision are negatively correlated with adaptation bias.** (a) We fit data from each subject collapsed across both blocks of the color stimulus-match experiment and across both blocks of the color adaptation experiment, using the mixture model approach described in Fig. 2. The correlation between representation precision in both experiments was  $r = 0.45$ . (b) Similar to (a), for face stimuli. The correlation between representation precision in the stimulus-match and adaptation experiments was  $r = 0.44$ . (c) We fit data from each subject collapsed across both blocks of the color adaptation experiment, using the mixture model approach described in Fig. 2. The Spearman's rank correlation coefficient between representation precision and adaptation bias was  $\rho = 0.26$ , 95% CI  $[-0.28, -0.25]$ . (d) Similar to (c), for face stimuli. The Spearman's rank correlation coefficient between representation precision and adaptation bias was  $\rho = 0.13$ , 95% CI  $[-0.15, -0.12]$ .



Table 3: **Subject enrollment and exclusion in the replication experiment with colors.** The total in the cells may not match the total number of subjects due to missing responses from some subjects.

| Completed:         | Registration | Screening   | Experiment  |
|--------------------|--------------|-------------|-------------|
| Number of subjects | 191          | 149         | 98          |
| Age: $M \pm SD$    | $37 \pm 12$  | $37 \pm 12$ | $39 \pm 12$ |
| Male/Female        | 110/81       | 87/62       | 60/38       |
| Left/Right-handed  | 8/176        | 4/139       | 0/95        |

Table 4: **Subject enrollment and exclusion in the replication experiment with faces.** The total in the cells may not match the total number of subjects due to missing responses from some subjects.

| Completed:         | Registration | Screening   | Experiment  |
|--------------------|--------------|-------------|-------------|
| Number of subjects | 281          | 234         | 94          |
| Age: $M \pm SD$    | $36 \pm 12$  | $37 \pm 12$ | $37 \pm 12$ |
| Male/Female        | 164/117      | 134/100     | 48/46       |
| Left/Right-handed  | 19/262       | 13/221      | 3/91        |

142 blocks of the *delayed-match* experiment (60 trials), and six blocks of the *adaptation* experiment (180 trials).  
143 Each subject performed the experiments for only one of the two stimulus classes (faces: 94 subjects; colors:  
144 98 subjects; Fig. 5a). A slightly more saturated version of the stimuli was used in an attempt to increase  
145 overall performance (Fig. 5b,c).

146 After fitting the data using the same approach as previously (Fig. 2), we analyzed the sources of vari-  
147 ability in response precision. In both color and face experiments, experimental block explained essentially  
148 no variation in response precision ( $F(5, 866) = 1.69, p = 0.13$  and  $F(5, 839) = 0.81, p = 0.54$  in the color  
149 and face experiments, respectively). In the color experiment, subject and task explained 27% and 19% of  
150 the total variance in precision scores, respectively ( $F(96, 866) = 4.94, p \approx 0$  and  $F(2, 839) = 162.5, p \approx 0$ ).  
151 In the face experiment, subject and task explained 40% and 16% of the total variance in precision scores,  
152 respectively ( $F(93, 839) = 8.36, p \approx 0$  and  $F(2, 839) = 157.4, p \approx 0$ ). We then analyzed the sources of  
153 variability in adaptation bias. In the color experiment, we observed that variability in adaptation bias was  
154 explained primarily by subject (44%) and secondarily by block (3%). In the face experiment, variability in  
155 adaptation bias was only significantly explained by subject (41%).

156 To investigate whether the inverse relationship between representation precision and adaptation biases  
157 was replicated, we extracted the bias and precision values for each subject, and calculated the correlation  
158 between these two quantities. We again observed that, across subjects, there was a negative correlation  
159 between mean precision and bias (color  $\rho = -0.22$ , 95% CI  $[-0.25, -0.20]$ ; faces  $\rho = -0.19$ , 95% CI  
160  $[-0.22, -0.17]$ ; Fig. 5d,e).

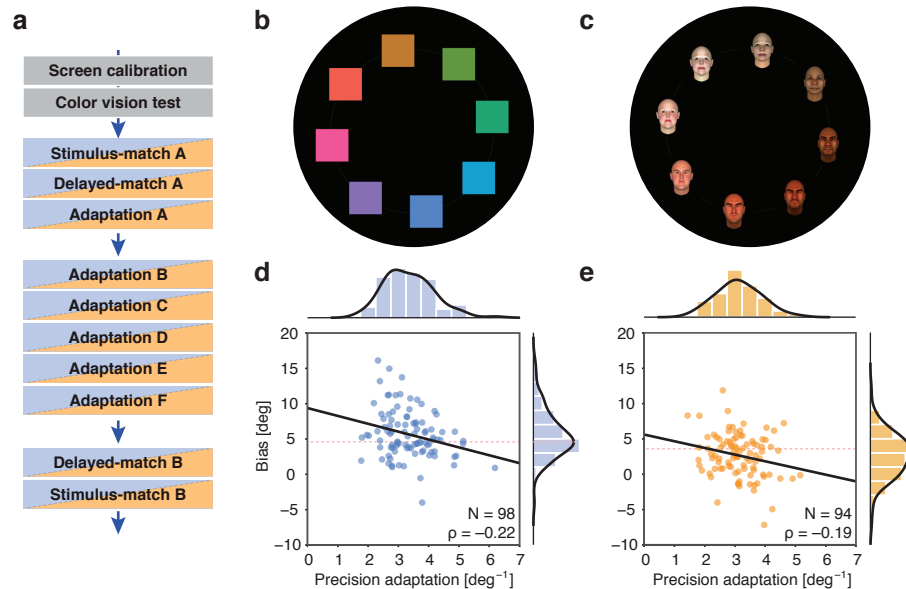

**Figure 5: Relationship between representation precision and adaptation bias in the replication experiment.** (a) Replication experiment structure. Subjects completed a battery of tests designed to estimate representation precision, precision after a delay, and precision and bias after adaptation. Each subject completed two blocks of the stimulus-match and the delayed-match experiments, and six blocks of the adaptation experiment, for either colors or faces. Prior to each experiment, subjects were presented with instructions and a comprehension quiz, and in the first time they performed each block of a given experiment, they also completed 5 practice trials. Each block of the stimulus-match experiment comprised 15 trials. Each block of the delayed-match and adaptation experiments comprised 30 trials. (b) Color stimuli. A circular space with 360 stimuli was used. Colors were generated to vary in hue but not in saturation or luminance (HSL space), though saturation was higher than in the first experiment. (c) Face stimuli. A circular space with 360 stimuli was used. Faces stimuli varied in age and gender, each forming one axis of the space. The extreme points on each axis also varied in identity, to maximize stimulus differences. (d) We fit data from each subject collapsed across all blocks of the color adaptation experiment, using the mixture model approach described in Fig. 2. The Spearman's rank correlation coefficient between representation precision and adaptation bias was  $\rho = 0.22$ , 95% CI  $[-0.25, -0.20]$ . (e) Similar to (d), for face stimuli. The Spearman's rank correlation coefficient between representation precision and adaptation bias was  $\rho = 0.19$ , 95% CI  $[-0.22, -0.17]$ .

## 161 Discussion

162 We investigated the relationship between individual differences in adaptation bias and response precision  
163 for colors and faces. In two cohorts of 202 and 192 subjects recruited through Amazon Mechanical Turk,  
164 precision and adaptation bias were found to be stable properties of the observer, with substantial variance  
165 in the measurements arising from between-subject differences. Across experiments and materials, we found  
166 that greater perceptual bias in an individual was associated with lower response precision.

167 A notable finding of our study was the substantial individual variation in the magnitude of perceptual  
168 adaptation. This measurement was reproducible across blocks within a testing session. As we did not  
169 measure across testing sessions, our measurement likely contains a component of state variation as well  
170 (although prior studies of individual variation in blur adaptation suggest this component is small; Vera-Diaz  
171 et al., 2010). The variation across individuals was roughly twice as large as the variation within subject across  
172 stimulus type (face and color). This indicates a stimulus-independent mechanism of variation in adaptation  
173 magnitude. We find that individual differences in sensory precision provide one such mechanism.

174 Our results are consistent with a model in which each subject is a Bayesian observer, each of whom  
175 differs in the fidelity with which they represent sensory input. We estimated each subject's precision by  
176 measuring response variability. A Bayesian interpretation assumes that response variability in turn reflects  
177 (to some degree) individual differences in the precision of sensory encoding. Although quite reproducible,  
178 the magnitude of correlation between response precision and adaptation bias was small (accounting for  
179 approximately 5% of between-subject variability in adaptation bias). Response precision is therefore an  
180 imperfect proxy for sensory precision, or other factors contribute to the substantial between-subject variation  
181 in the adaptation effect that is shared across stimulus types.

182 Consistent with previous theoretical and empirical work (Stocker and Simoncelli, 2006a; Schmack et al.,  
183 2016), our results indicate that the sensory prior is adjusted on every trial. This is because the circular  
184 stimulus space ensures that any systematic bias produced by non-uniform priors or asymmetric likelihoods  
185 on one trial is compensated by an equal and opposing bias on other trials. Instead, the effect of the  
186 adapting stimulus is to shift the prior to be centered on the recently viewed stimulus. When combined with  
187 a likelihood distribution that is centered at the test value yet asymmetric, the posterior mean contains the  
188 observed repulsive bias (Wei and Stocker, 2015).

189 We recruited subjects through the Amazon Mechanical Turk platform and conducted our experiments  
190 using a custom-built website. In addition to allowing a larger sample size, web-based experiments improve  
191 subject diversity (Woods et al., 2015). A major challenge of web-based data collection is that subjects  
192 may be motivated not to provide a high level of performance, but instead to complete the task as quickly

193 as possible to obtain payment. To meet this challenge, our on-line test was designed so that it would be  
194 completed most rapidly if the subject produced accurate responses. Additional measures to improve data  
195 quality included quizzes to ensure comprehension of the instructions and paying proportionally large bonuses  
196 for compliant subjects. While the exclusion of subjects with low accuracy limited the range of precision  
197 values we could have measured from our population, we regarded this as an acceptable compromise to  
198 exclude subjects who made no attempt to achieve the goals of the measurement.

## 199 **Methods**

### 200 **Participants**

201 A total of 1002 people were recruited through Amazon Mechanical Turk (Tables 1, 3, 4). This research  
202 was reviewed and deemed exempt from oversight by the University of Pennsylvania Institutional Review  
203 Board, and therefore informed consent was not collected. Information on the home page of the web-based  
204 experiment indicated the research nature of the project. No information that could identify participants was  
205 collected. All subjects received a fixed minimum compensation of \$0.25 for their participation in addition to  
206 a performance-based bonus of up to \$12.00. The full experiment took approximately 1 hour and 15 minutes  
207 for completion, and subjects that reached the end received a bonus of  $M=\$7.68$ ,  $SD=\$0.51$ ).

### 208 **Stimuli and Materials**

209 The experiment was programmed in Javascript language and hosted on a website which subjects accessed  
210 using their own computers (<https://cfn.upenn.edu/iadapt>). Stimuli consisted of synthetic faces generated  
211 with FaceGen Main SDK (Inversions, 2012) and colored squares.

212 The face set used in the initial experiment varied in age and gender. Two base stimuli were generated  
213 by varying the gender of an identity-neutral face from male to female, and another two base stimuli were  
214 generated by varying the age of an identity-neutral face from 15 to 65 years old. Based on these four stimuli,  
215 a set of 360 faces were generated in a circular space with main axes corresponding to age and gender.

216 The color set varied in hue with no nominal variation in lightness and saturation. A set of 360 color  
217 values were generated in HSL space with  $L^*$  held fixed at 25 and saturation equal to 7. This saturation  
218 value was determined in pilot experiments as producing stimuli with approximately equal salience to the  
219 face stimuli. The set of HSL value were then converted to sRGB space.

220 For the replication experiment, a new set of face and color stimuli was generated. The face stimuli  
221 were again generated based on four stimuli that varied on age (15-65 years old) and gender (male-female),  
222 but now also on identity, producing more distinctive faces than the previous set. The color stimuli were  
223 again generated in HSL space with  $L^*$  held fixed at 25, but now with saturation equal to 20 (the maximum  
224 value that produced sRGB values within the 0-255 range displayable in regular monitors), producing more  
225 distinctive colors than in the initial experiment.

## 226 Experimental procedure

227 Subjects recruited through Mechanical Turk were redirected to the experiment website, where they entered  
228 their responses using their mouse and keyboards and, upon completion, received a randomly generated code  
229 which they entered again on Mechanical Turk for payment. Each experimental session started with a basic  
230 description of the procedures, followed by a demographics questionnaire. Subjects then completed a screen  
231 calibration procedure and a color perception test followed by the main experimental blocks.

232 In the screen calibration procedure, subjects were presented with a set of discrete color gradients, each  
233 ranging from black to a distinct, saturated color value. They were then asked to adjust the screen settings  
234 and/or the angle of their laptop screen to allow them to simultaneously distinguish between neighboring  
235 colors on both ends of the each gradient. In the color perception test, subjects completed eight trials of the  
236 Ishihara test, a test for congenital color deficiencies. Subjects proceeded to the main experimental blocks if  
237 at least seven responses were correct.

238 Subjects then completed 2-6 blocks of each of the following experiments: (i) *stimulus-match*; (ii) *delayed-*  
239 *match*; (iii) *adaptation* (Fig. 1a). Each block consisted of 15-30 trials ( $\sim$ 2-5 minutes) in which subjects were  
240 instructed to report the value of a target stimulus – a color or a face – by clicking and moving the mouse  
241 cursor around a stimulus wheel (Fig. 1b), allowing a fine adjustment of their responses. Prior to performing  
242 each type of experiment for the first time, subjects were presented with detailed instructions, a mini-quiz  
243 containing three questions with three alternatives each about the instructions, and five practice trials. If  
244 any answer to the quiz was incorrect, subjects were repeatedly presented with the instructions and asked  
245 to complete the quiz, until all three answers were simultaneously correct. Similarly, subjects repeated  
246 the practice experiment as many times as necessary until all five responses were within  $5^\circ$  of the target.  
247 Together, these approaches ensured comprehension of the experiment instructions, and that subjects were  
248 able to adequately perform the experiment on their computer.

249 Experimental blocks were completed in the following order: (1) color stimulus-match; (2) face stimulus-  
250 match; (3) color delayed-match; (4) face delayed-match; (5) color adaptation; (6) face adaptation; (7) color  
251 delayed-match; (8) face delayed-match; (9) color adaptation; (10) face adaptation; (11) color stimulus-  
252 match; (12) face stimulus-match (Fig. 1a). In the replication dataset, blocks (only one stimulus class) were  
253 completed in the following order: (1) stimulus-match; (2) delayed-match; (3-8) adaptation; (9) delayed-  
254 match; (10) stimulus-match (Fig. 5a).

255 We calculated subject accuracy on every trial (0%: chance; 100%: perfect) and, at the end of each block,  
256 we calculated the average accuracy for that block. The compensation accumulated by subjects increased at  
257 the end of each experimental block by an amount proportional to the average accuracy. Subjects were then

258 presented with their average accuracy in the finished block, the corresponding dollar amount accumulated,  
259 and the total compensation accumulated in the experimental session up to that point. If the accuracy on  
260 any block ended up below 20%, the session was terminated and subjects were directed back to Amazon  
261 Mechanical Turk to receive their payment. Only subjects who maintained accuracy above 20% in all blocks  
262 were able to reach the end of the experiment. Those subjects received twice the regular compensation. Out  
263 of the 1002 subjects recruited, 197 were excluded for either abandoning or not passing the color perception  
264 test, and 411 for not maintaining accuracy above 20% throughout the entire session. Only data from the  
265 remaining 394 subjects were included in the analyses described in this paper (Tables 1, 3, 4).

### 266 **Stimulus-match experiment**

267 Each block consisted of 15 trials, with target values sampled uniformly ( $24^\circ$  spacing) from the circular  
268 space. On each trial, subjects were presented with a target stimulus on both left and right sides of the black  
269 background screen, along with a stimulus wheel containing eight thumbnails with representative stimuli  
270 from the circular space (Fig. 1c, Top). The specific thumbnails, their position, and the mapping of stimulus  
271 value to screen position, varied randomly on each trial. Subjects were instructed to click once with the  
272 cursor positioned on the region of the screen corresponding to the target location. The selected stimulus  
273 was then presented in the center of the screen, and subjects were allowed to fine-tune their response by  
274 moving the cursor around the stimulus wheel before confirming their selection with a second mouse click  
275 (Fig. 1b).

276 During the fine-tuning phase, the stimulus presented in the center of the screen varied (in steps of  $1^\circ$ ),  
277 to allow subjects to precisely match their responses to the target stimulus. The second (confirmation) click  
278 was registered only if it occurred within 2-10 seconds after the trial onset. If no response was entered for  
279 10 seconds, a dialog box was displayed warning the subject to pay attention and click the OK button to  
280 continue. On these trials, an accuracy of 0% was registered (for the purpose of calculating the average block  
281 accuracy), though they were not included in the main analyses. Similarly, if responses were more than  $90^\circ$   
282 away from the target, a dialog box was displayed warning the subject to pay attention and click the OK  
283 button to continue. These measures ensured that subjects maintained continuous attention throughout the  
284 entire block and slowed down subjects who attempted to rush through the experiment without care.

### 285 **Delayed-match experiment**

286 Each block consisted of 30 trials, with target values sampled uniformly ( $12^\circ$  spacing) from the circular  
287 space. On each trial, subjects were presented with a target stimulus in the center of the screen for 2000 ms,

288 followed by a mask stimulus (ISI: 500 ms) at the same location for 200 ms, followed by a 4000 ms interval of  
289 a blank screen during which no response was allowed (Fig. 1c, Middle). After this interval, subjects entered  
290 their responses using the same procedure described previously (Fig. 1b). The same measures described  
291 previously were used to ensure that subjects maintained continuous attention throughout the entire block.

292 Color masks were checkerboards composed of various colors randomly sampled from within the stimulus  
293 set. Face masks were created using the steerable pyramids method, which are modifications of the original  
294 face stimuli that retain many low-level visual properties (Portilla and Simoncelli, 2000; Fig. 1d).

## 295 **Adaptation experiment**

296 Each block consisted of 30 trials, with target values sampled uniformly ( $12^\circ$  spacing) from the circular space.  
297 On each trial, subjects were presented with an adaptor stimulus in the center of the screen for 5000 ms,  
298 immediately followed by a mask stimulus at the same location for 100 ms, by target stimulus for 200 ms  
299 (ISI: 50 ms), and by a 100 ms interval of a blank screen during which no response was allowed (Fig. 1c,  
300 Bottom). After this interval, subjects entered their responses using the same procedure described previously  
301 was used (Fig. 1b). In addition to measures to ensure attention described previously, subjects also received  
302 a warning if their responses were within  $10^\circ$  from the adaptor position. In these cases, a dialog box was  
303 presented indicating that subjects should ignore the adaptor and report the value of the target, and click  
304 the OK button to continue.

## 305 **Data analysis**

306 We used methods for circular data (Fisher, 1995). We calculated the error on each trial as the angular de-  
307 viation on the stimulus wheel between the target value and the response entered. We then used maximum  
308 likelihood estimation to fit the distribution of error values in the circular space. In both stimulus-match and  
309 delayed-match experiments, the distribution of error values was decomposed into two parameters that repre-  
310 sent a mixture of a uniform distribution (corresponding to random responses) and a von Mises distribution  
311 – the circular analog of the normal distribution on a line – centered on the target value. The parameters  
312 fit by this procedure correspond to the probability of guesses, which is inversely related to the height of the  
313 uniform distribution, and the precision of responses, which is the inverse of the standard deviation of the  
314 von Mises distribution (Fig. 2a).

315 In the adaptation experiment, the distribution of error values was decomposed into four parameters that  
316 represent a mixture of a uniform distribution (corresponding to random responses), a von Mises distribution  
317 centered on the adaptor value (corresponding to responses where the subject mistakenly attempts to report



318 the value of the adaptor), and a von Mises distribution with equal concentration parameter centered *near*  
319 the target value. The parameters fit by this procedure correspond to the probability of guesses, the precision  
320 of responses, which is the inverse of the standard deviation of the von Mises distributions, and the bias,  
321 which is the mean of the von Mises distribution centered near the target value (Fig. 2a).

## 322 References

- 323 Anstis, S., Verstraten, F. A., and Mather, G. (1998). The motion aftereffect. *Trends in cognitive sciences*,  
324 2(3):111–117.
- 325 Bar, M. (2004). Visual objects in context. *Nature Reviews Neuroscience*, 5(8):617–629.
- 326 Bayes, M. and Price, M. (1763). An essay towards solving a problem in the doctrine of chances. by the  
327 late rev. mr. bayes, frs communicated by mr. price, in a letter to john canton, amfrs. *Philosophical*  
328 *Transactions (1683-1775)*, pages 370–418.
- 329 Bays, P. M., Catalao, R. F., and Husain, M. (2009). The precision of visual working memory is set by  
330 allocation of a shared resource. *Journal of vision*, 9(10):7–7.
- 331 Clifford, C. W. (2002). Perceptual adaptation: motion parallels orientation. *Trends in cognitive sciences*,  
332 6(3):136–143.
- 333 Eagleman, D. M. (2001). Visual illusions and neurobiology. *Nature Reviews Neuroscience*, 2(12):920–926.
- 334 Fischer, J. and Whitney, D. (2014). Serial dependence in visual perception. *Nature neuroscience*, 17(5):738.
- 335 Fisher, N. I. (1995). *Statistical analysis of circular data*. Cambridge University Press.
- 336 Gibson, J. J. and Radner, M. (1937). Adaptation, after-effect and contrast in the perception of tilted lines.  
337 i. quantitative studies. *Journal of Experimental Psychology*, 20(5):453.
- 338 Inversions, S. (2012). Facegen. *Singular Inversions*.
- 339 Ishihara, S. (1960). *Tests for colour-blindness*. Kanehara Shuppan Company.
- 340 Jameson, D. and Hurvich, L. M. (1972). Color adaptation: Sensitivity, contrast, after-images. In *Visual*  
341 *psychophysics*, pages 568–581. Springer.
- 342 Jammalamadaka, S. R. and Sengupta, A. (2001). *Topics in circular statistics*, volume 5. World Scientific.
- 343 Knill, D. C. and Richards, W. (1996). *Perception as Bayesian inference*. Cambridge University Press.
- 344 Lafer-Sousa, R., Hermann, K. L., and Conway, B. R. (2015). Striking individual differences in color percep-  
345 tion uncovered by the dress photograph. *Current Biology*, 25(13):R545–R546.
- 346 Levinson, E. and Sekuler, R. (1976). Adaptation alters perceived direction of motion. *Vision research*,  
347 16(7):779IN7–781.

- 348 Little, A. C., DeBruine, L. M., and Jones, B. C. (2005). Sex-contingent face after-effects suggest distinct  
349 neural populations code male and female faces. *Proceedings of the Royal Society of London B: Biological*  
350 *Sciences*, 272(1578):2283–2287.
- 351 Mattar, M. G., Kahn, D. A., Thompson-Schill, S. L., and Aguirre, G. K. (2016). Varying timescales of  
352 stimulus integration unite neural adaptation and prototype formation. *Current Biology*.
- 353 Olkkonen, M., McCarthy, P. F., and Allred, S. R. (2014). The central tendency bias in color perception:  
354 Effects of internal and external noise. *Journal of vision*, 14(11):5–5.
- 355 Portilla, J. and Simoncelli, E. P. (2000). A parametric texture model based on joint statistics of complex  
356 wavelet coefficients. *International journal of computer vision*, 40(1):49–70.
- 357 Schmack, K., Weilhhammer, V., Heinzle, J., Stephan, K. E., and Sterzer, P. (2016). Learning what to see  
358 in a changing world. *Frontiers in human neuroscience*, 10:263.
- 359 Stocker, A. and Simoncelli, E. P. (2006a). Sensory adaptation within a bayesian framework for perception.  
360 *Advances in neural information processing systems*, 18:1289.
- 361 Stocker, A. A. and Simoncelli, E. P. (2006b). Noise characteristics and prior expectations in human visual  
362 speed perception. *Nature neuroscience*, 9(4):578–585.
- 363 Summerfield, C. and Egner, T. (2009). Expectation (and attention) in visual cognition. *Trends in cognitive*  
364 *sciences*, 13(9):403–409.
- 365 Vera-Diaz, F. A., Woods, R. L., and Peli, E. (2010). Shape and individual variability of the blur adaptation  
366 curve. *Vision Research*, 50(15):1452–1461.
- 367 von Helmholtz, H. (1867). *Treatise on physiological optics* vol. iii.
- 368 Webster, M. A., Kaping, D., Mizokami, Y., and Duhamel, P. (2004). Adaptation to natural facial categories.  
369 *Nature*, 428(6982):557–561.
- 370 Wei, X.-X. and Stocker, A. A. (2015). A bayesian observer model constrained by efficient coding can  
371 explain ‘anti-bayesian’ percepts. *Nature neuroscience*, 18(10):1509–1517.
- 372 Woods, A. T., Velasco, C., Levitan, C. A., Wan, X., and Spence, C. (2015). Conducting perception research  
373 over the internet: a tutorial review. *PeerJ*, 3:e1058.
- 374 Zhang, W. and Luck, S. J. (2008). Discrete fixed-resolution representations in visual working memory.  
375 *Nature*, 453(7192):233–235.

## 376 **Acknowledgements**

377 This research was supported by National Institutes of Health Grants EY021717 (STS and GKA). We thank  
378 Alan Stocker for many helpful discussions.

379 The authors declare no competing commercial interests.

## 380 **Author Contributions**

381 Conceptualization, M.G.M., G.K.A., and S.L.T.-S.; Methodology, M.G.M. and G.K.A.; Software and Formal  
382 Analysis, M.G.M., M.C., and M.Z.; Visualization, M.G.M. and G.K.A.; Supervision, G.K.A. and S.L.T.-S.;  
383 Writing – Original Draft, M.G.M. and G.K.A.; Writing – Review Editing, M.G.M., G.K.A., and S.L.T.-S.;  
384 Funding Acquisition, G.K.A. and S.L.T.-S.

## 385 **Keywords**

386 visual adaptation, individual differences, face perception, color perception, Bayesian inference, Amazon  
387 Mechanical Turk
